# Supplementary material
Source: publisher figshare collection journal article supplement (https://acs.figshare.com/ndownloader/files/4204489)
Supplement: Supplementary file 1 [file 4204489]

Supporting information for

## Electro-Thermally Induced Highly Responsive and Highly Selective Vanadium Oxide Hydrogen Sensor based on Metal-insulator Transition

Ji Won Byun<sup>1</sup>, Min-Bin Kim<sup>1</sup>, Myung Hwa Kim<sup>2</sup>, Sung Youb Kim<sup>1</sup>, Sang Hyun Lee<sup>3</sup>,  
Byung Cheol Lee<sup>3</sup>, and Jeong Min Baik<sup>1\*</sup>

<sup>1</sup>*School of Mechanical and Advanced Materials Engineering, Ulsan National Institute of Science and Technology (UNIST), Ulsan, Korea*

<sup>2</sup>*Department of Chemistry & Nano Science, Ewha Womans University, Seoul, 120-745, Korea*

<sup>3</sup>*Radiation Instruments Research Division, Korea Atomic Energy Research Institute (KAERI), Daejeon, 305-353, Korea*

*\*To whom all correspondence should be addressed. Email: jbaik@unist.ac.kr*

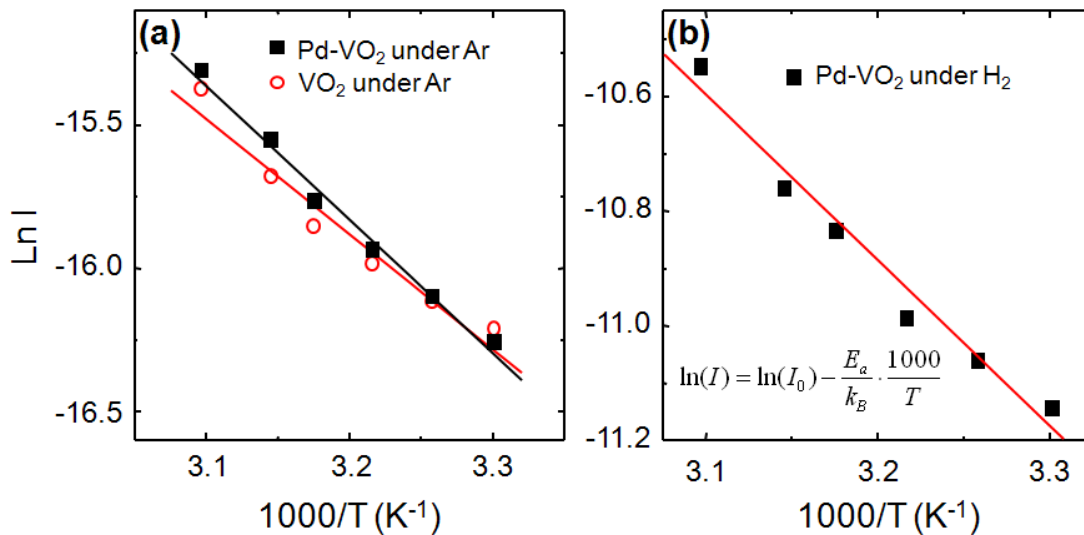

**Figure 1S.** Plots of  $\ln I$  vs.  $1000/T$  of  $\text{VO}_2$  under Ar,  $\text{Pd-VO}_2$  under Ar and  $\text{H}_2$ .

**Table 1S.** Dimension, electrical and thermal conductivity of VO<sub>2</sub> nanowire and SiO<sub>2</sub> substrate.

|                                                            |                                                                                       |
|------------------------------------------------------------|---------------------------------------------------------------------------------------|
| VO <sub>2</sub> nanowire dimension W×H×L [μm]              | 0.10 × 0.07 × 20.0                                                                    |
| SiO <sub>2</sub> substrate dimension W×H×L [μm]            | 100 × 100 × 100                                                                       |
| Current density of nanowire J [A/cm <sup>2</sup> ]         | 0.5×10 <sup>4</sup> , 1.0×10 <sup>4</sup> , 2.0×10 <sup>4</sup> , 3.5×10 <sup>4</sup> |
| Thermal conductivity of nanowire k <sub>n</sub> [W/(m·K)]  | 5.10                                                                                  |
| Thermal conductivity of substrate k <sub>s</sub> [W/(m·K)] | 1.05                                                                                  |
| Applied voltage E <sub>app</sub> [V]                       | 5.0                                                                                   |
| Ambient and Initial Temperatures [°C]                      | 45.0                                                                                  |

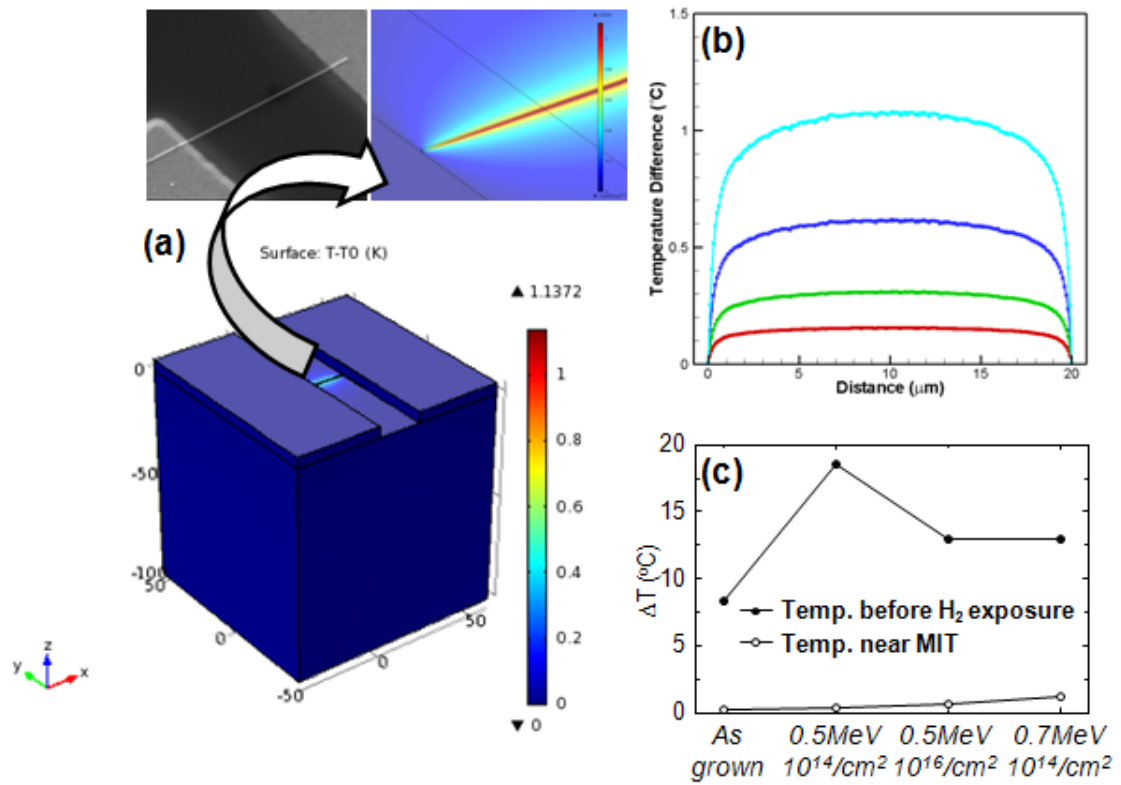

**Figure 2S.** (a) 3D model in COMSOL of a VO<sub>2</sub> nanowire (lateral dimension: 70 × 100 nm) on a SiO<sub>2</sub>/Si substrate (Inset shows the SEM image of the VO<sub>2</sub> nanowire) (b) Plots of ΔT versus distance along the axis of the nanowire shown in (a) measured at 5 V as a

function of e-beam irradiation power and dose. (c) temperature difference of nanowires before H<sub>2</sub> exposure and near MIT as a function of e-beam irradiation power and dose.

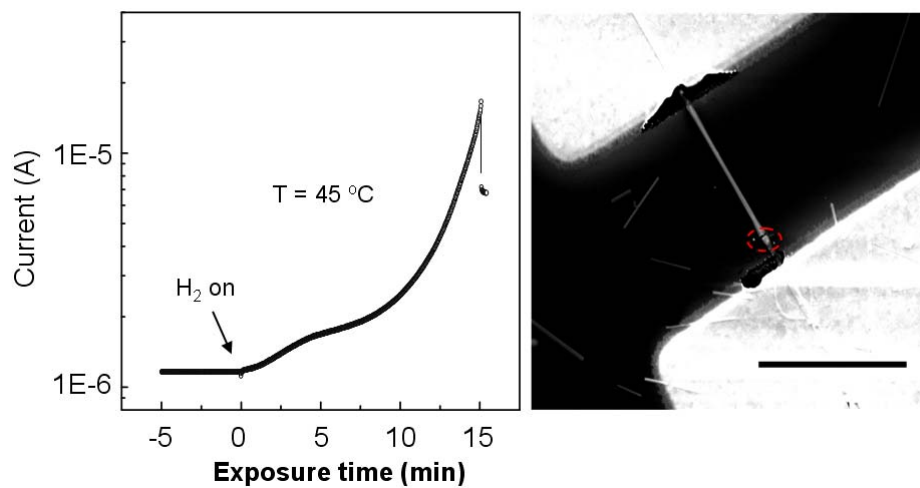

**Figure 3S.** *I-V* curve and SEM image of Pd-VO<sub>2</sub> after e-beam irradiation at 0.7 MeV.
